# Supplementary material for: A lung-targeted self-assembled supramolecular nanofiber for synergistic therapy of idiopathic pulmonary fibrosis
Source: Royal Society of Chemistry journal article supplement (doi:10.1039/d5nr04194e), 2026-01-01
Supplement: d5nr04194e1.pdf [file d5nr04194e1.pdf]

## Supporting Information

### **A Lung-Targeted Self-Assembled Supramolecular nanofiber for Synergistic Therapy of Idiopathic Pulmonary Fibrosis**

*Jiaxi Han<sup>[1]</sup>, Taotian Zhang<sup>[1]</sup>, Yilin Jiang, Tianyuan Chen, Jiawei Lu, Zhenkang Diao, Qing Lin, Shiqi Huang\*, Ling Zhang\**

## S1. Supplementary Figures

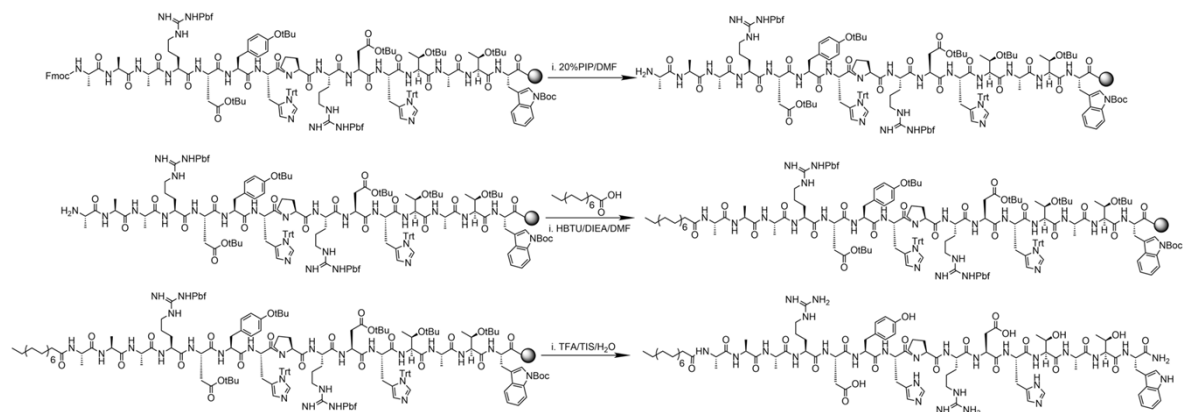

**Figure S1.** Flowchart of the Coupling Process of Fatty Chains and Peptides

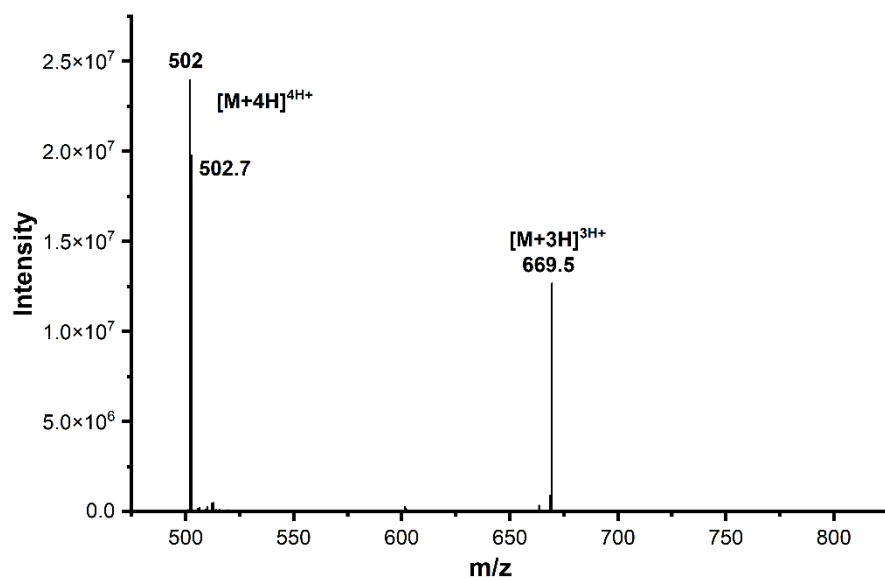

**Figure S2.** ESI-MS spectrum of RPA

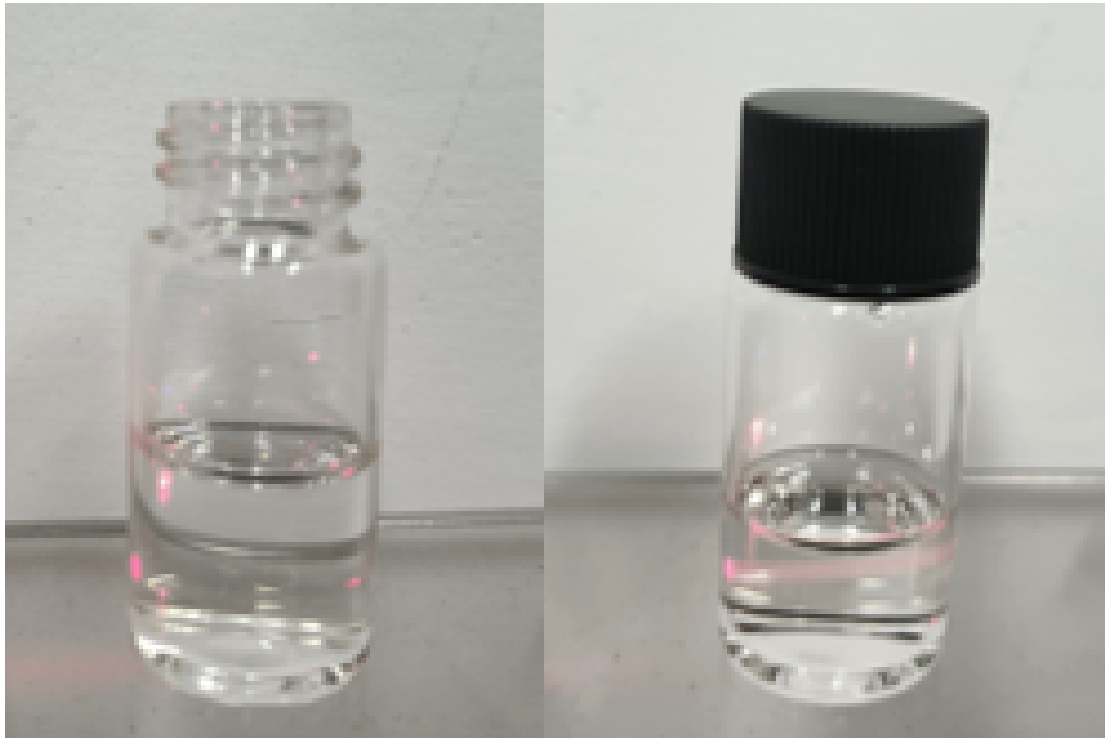

**Figure S3.** Macroscopic image after co-incubation of erythrocytes and hydrogel leachates.

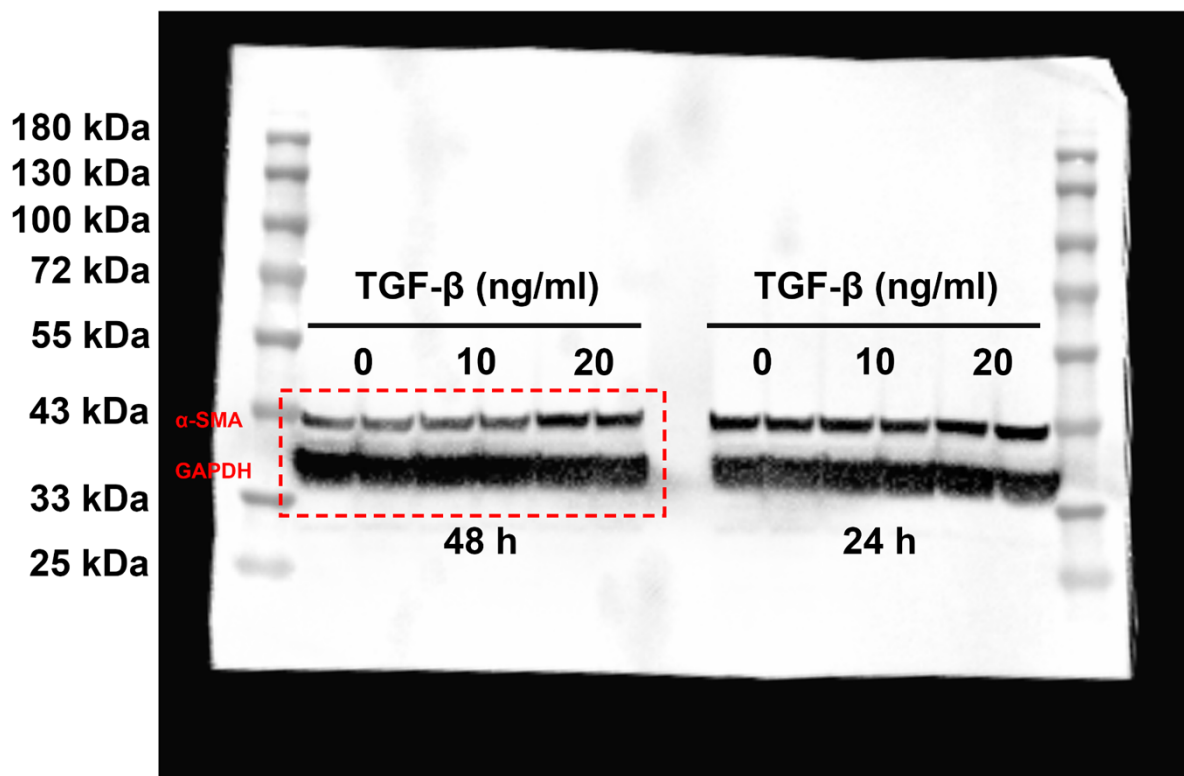

**Figure S4.** Original Western Blot Bands for  $\alpha$ -SMA

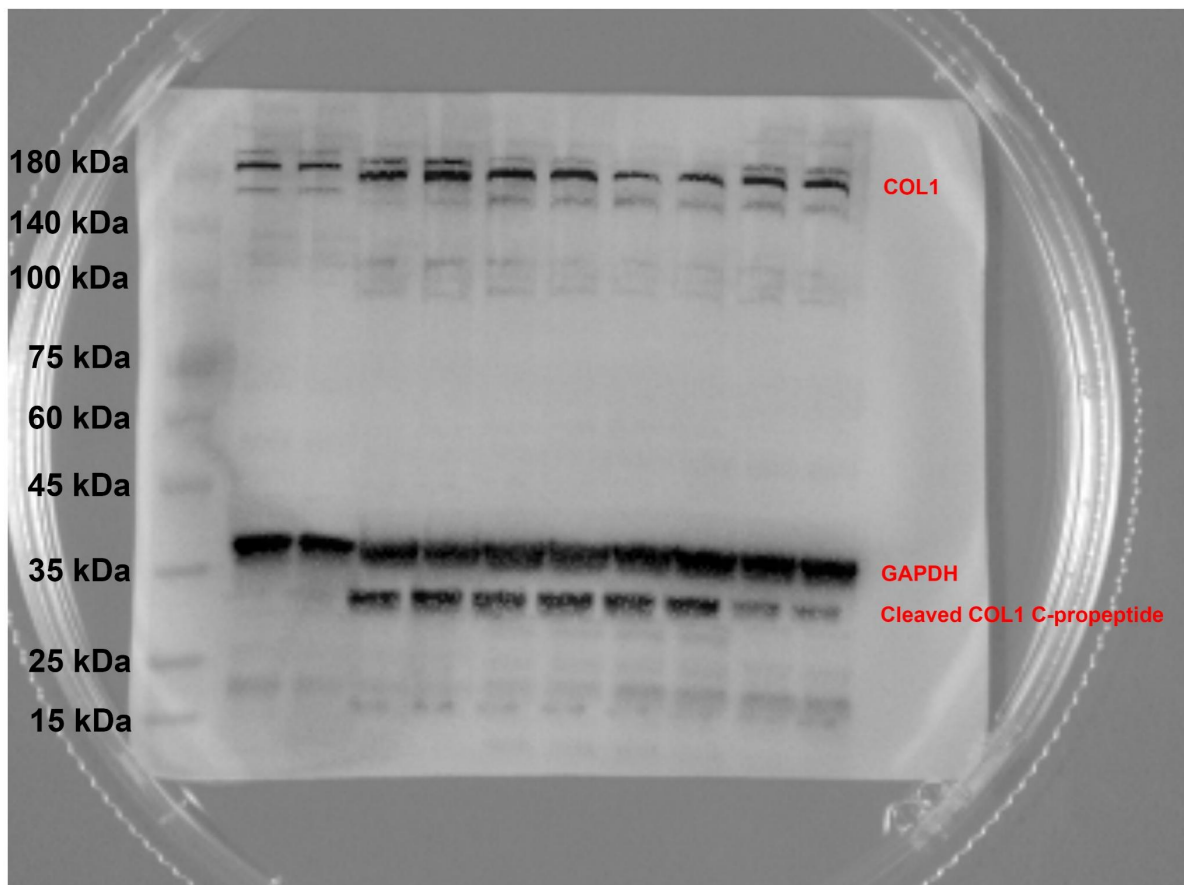

**Figure S5.** Original Western blot bands for collagen type I (COL-1)

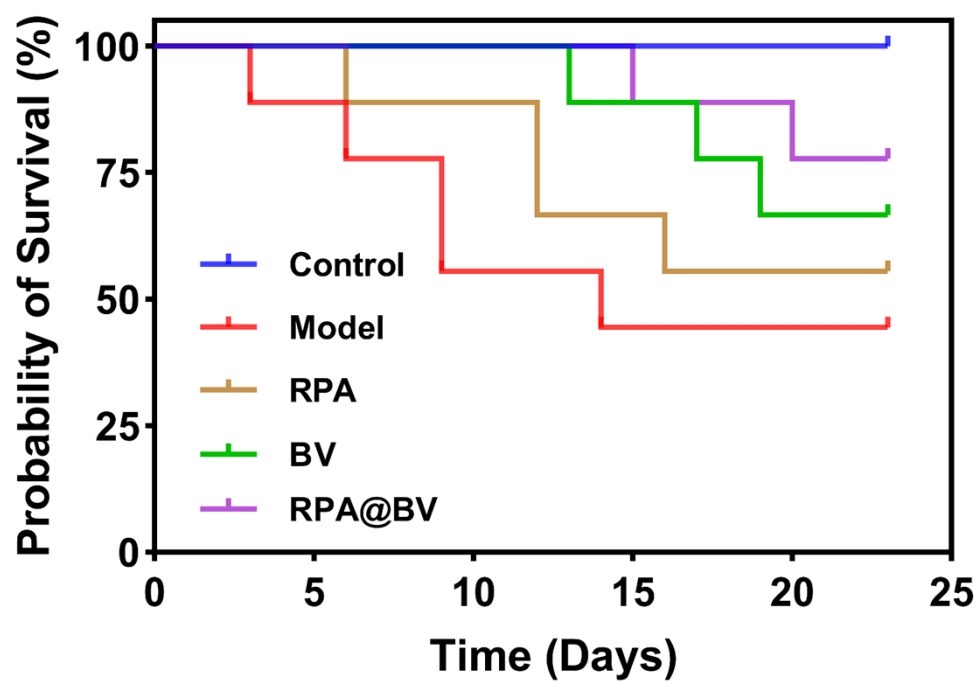

**Figure S6.** Survival curve of mice during the treatment period (n = 8 biologically independent samples).

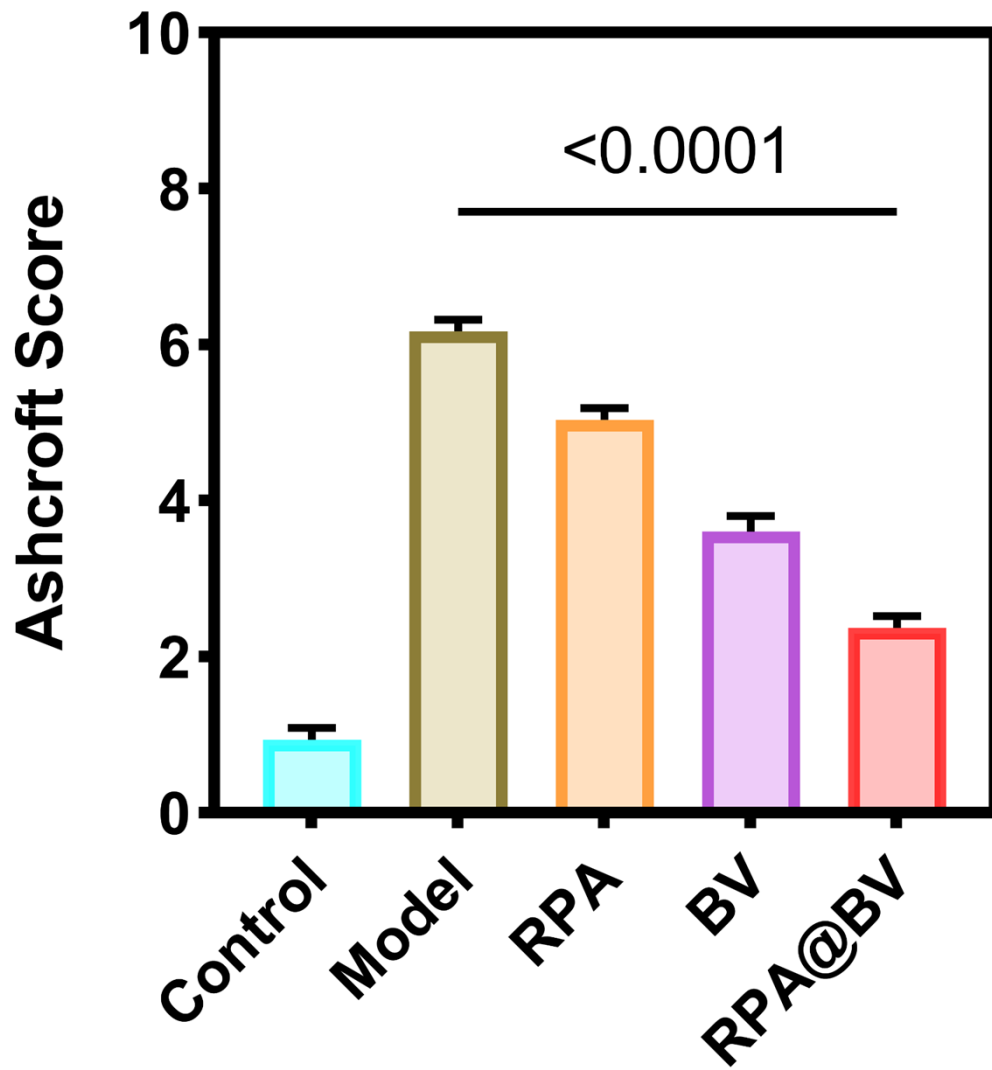

**Figure S7.** Ashcroft scoring of lung tissue sections after H&E staining. (n = 3 biologically independent samples, mean  $\pm$  SD). The statistical significance was evaluated by one-way ANOVA with Tukey's post hoc test.

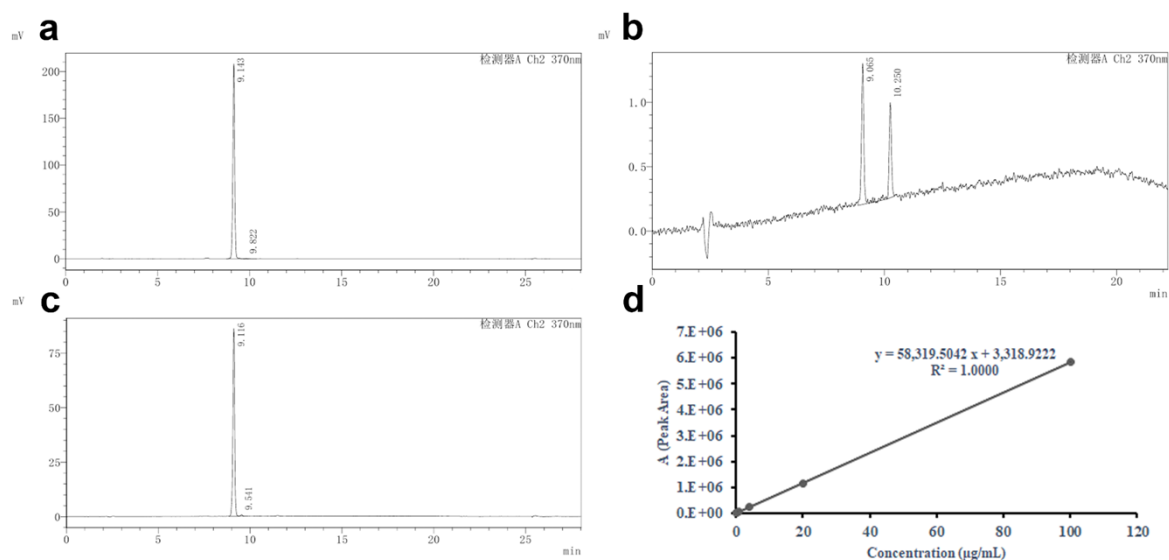

**Figure S8.** Method specificity of BIBF. **a–c.** Chromatographic profiles of BIBF, VS-6766, and RPA@BV at wavelength of 370 nm; **d.** Standard curve of BIBF.

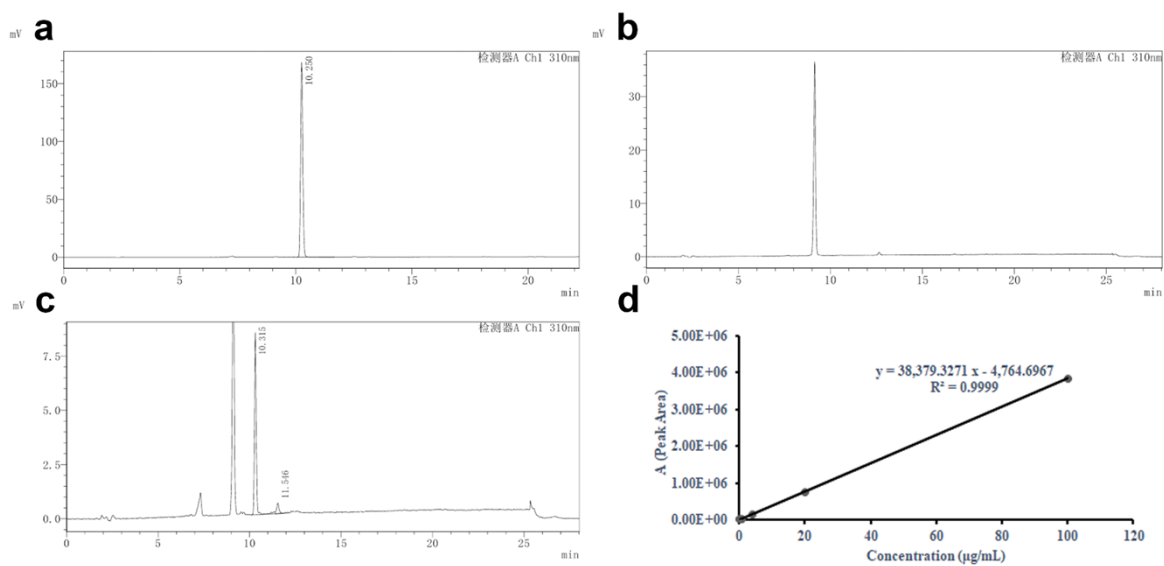

**Figure S9.** Method specificity of VS-6766. **a–c.** Chromatograms of VS-6766, BIBF, and RPA@BV at wavelength of 310 nm. **d.** Standard curve of VS-6766.

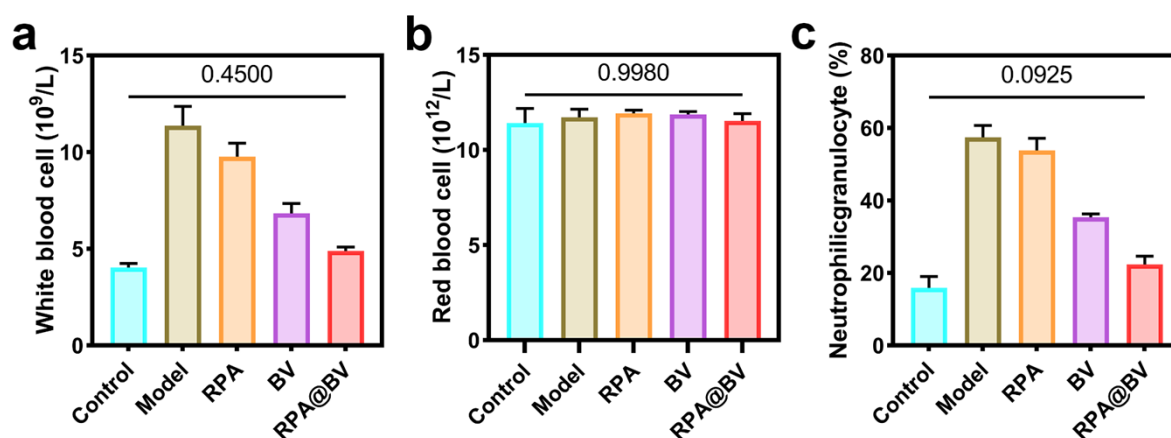

**Figure S10.** Hematological parameters. **a.** White blood cell (WBC) count. **b.** Red blood cell (RBC) count. **c.** Neutrophil percentage. (n = 3 biologically independent samples, mean  $\pm$  SD). The statistical significance was evaluated by one-way ANOVA with Tukey's post hoc test.

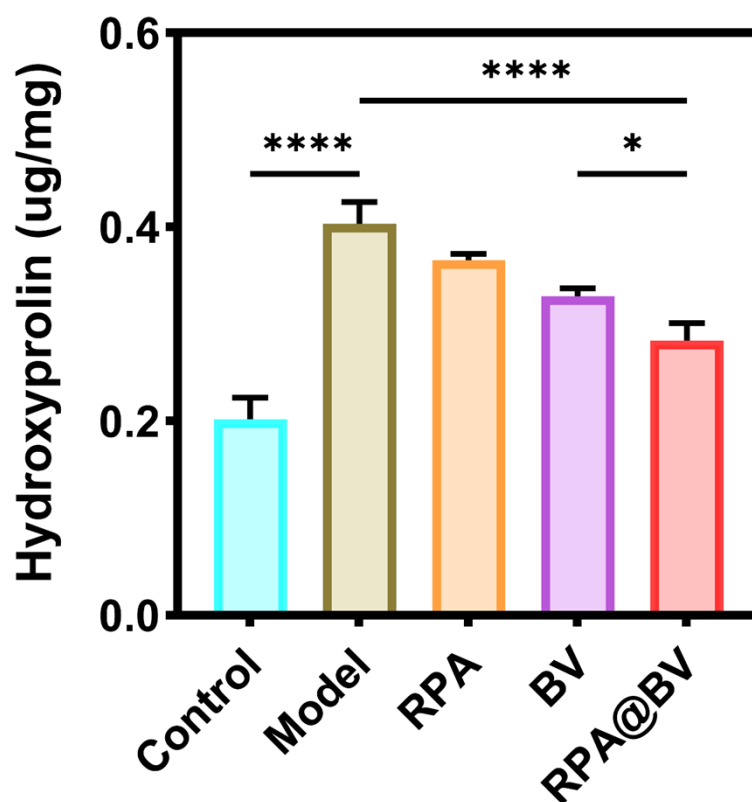

**Figure S11.** Hydroxyproline content in mice lung tissues. (n = 3 biologically independent samples, mean  $\pm$  SD). The statistical significance was evaluated by one-way ANOVA with Tukey's post hoc test.

**Table S1.** The mass of various required amino acids and the corresponding volume of solvent

| Reagent       | Volume (mL) | Mass (g) |
|---------------|-------------|----------|
| Alanine       | 42          | 2.62     |
| Aspartic acid | 21          | 1.73     |
| Histidine     | 11          | 1.37     |
| Proline       | 11          | 0.75     |
| Arginine      | 21          | 2.73     |
| Threonine     | 21          | 1.67     |
| Tryptophan    | 11          | 1.16     |
| Tyrosine      | 11          | 1.02     |



**Table S2.** The drug loading capacity and encapsulation efficiency of different ratio of the total mass of BIBF and VS-6766 to the mass of the amphiphilic RPA peptide

| <b>W<sub>d</sub> : W<sub>R</sub></b> | <b>EE of BIBF (%)</b> | <b>EE of VS (%)</b> | <b>DL (wt%)</b> |
|--------------------------------------|-----------------------|---------------------|-----------------|
| <b>2: 4.67</b>                       | 88.78                 | 22.87               | 25.1%           |
| <b>2: 3</b>                          | 99.6                  | 23.18               | 37.88%          |
| <b>1: 1</b>                          | 94.69                 | 15.26               | 41.35%          |

**Table S3.** The drug loading capacity and encapsulation efficiency of different ratios of BIBF to VS-6766

| <b>BIBF: VS</b> | <b>EE of BIBF (%)</b> | <b>EE of VS (%)</b> | <b>DL (wt%)</b> |
|-----------------|-----------------------|---------------------|-----------------|
| 5: 1            | 89.29                 | 41.9                | 29.08%          |
| 1: 1            | 99.6                  | 23.18               | 37.88%          |
| 1: 4            | 90.4                  | 4.32                | 10.74%          |

**Table S4.** The IC<sub>50</sub> and CI values of HELF cells after being treated with free drugs at different ratios for 48 hours

| <b>Drug/ Combo</b> | <b>CI value</b> | <b>IC<sub>50</sub>, BIBF</b> | <b>IC<sub>50</sub>, VS</b> |
|--------------------|-----------------|------------------------------|----------------------------|
| BIBF               |                 | 245.275                      |                            |
| VS-6766            |                 |                              | 3247.33                    |
| BIBF/ VS 10: 1     | 1.339           | 326.037                      | 32.6037                    |
| BIBF/ VS 5: 1      | 0.985           | 237.972                      | 47.5944                    |
| BIBF/ VS 1: 1      | 0.622           | 141.761                      | 141.761                    |
| BIBF/ VS 1: 5      | 0.564           | 100.473                      | 502.365                    |
| BIBF/ VS 1: 10     | 0.584           | 81.5654                      | 815.654                    |
